# Supplementary material
Source: publisher figshare collection journal article supplement (https://tandf.figshare.com/articles/dataset/_/25942783)
Supplement: Supplementary file 1 [file 1]

**AGREEMENT IN RELATION TO COPYRIGHT IN AN ARTICLE**

In order to ensure both the widest dissemination and protection of material published in our Journal, we ask Authors to transfer to Informa UK Limited trading as Taylor & Francis Group the rights of copyright in the Articles they contribute. This enables us to ensure protection against infringement. The transfer of copyright must be clearly stated in writing.

**PLEASE PROVIDE US WITH THE FOLLOWING INFORMATION, REVIEW OUR POLICIES, AND CONFIRM YOUR ACCEPTANCE OF THE TERMS OF THE ATTACHED ARTICLE PUBLISHING AGREEMENT BY SIGNING THIS FORM AS INDICATED BELOW.**

Article (the "Article") entitled: Generation of vessel track characteristics using a Conditional Generative Adversarial Network (CGAN)

Author(s): Jessica Campbell, Martha Dais Ferreira, Anthony Isenor

To be published in the journal (the "Journal"): Applied Artificial Intelligence (Taylor & Francis)

**YOUR STATUS****I am the sole author of the Article**

Please indicate if any of the statements below also apply to you:

- ☐ I am UK, Canadian or Australian Government employee and claim Crown Copyright
- ☐ I am a US Government employee and there is no copyright to transfer
- ☐ I am an NIH employee and there is no copyright to transfer. I am not required to sign this form and attach the NIH addendum
- ☐ I am a contractor of the US Government (includes NIH contractors) under contract number: ..... I am required to sign this form

**X I am one of 3 co-authors of the Article and confirm I have the consent of my co-authors to sign this agreement on their behalf**

Please indicate if any of the below also apply to you and your co-authors:

- X** All of my co-authors are UK, Canadian or Australian Government employees and Crown Copyright is claimed
- ☐ One or more of my co-authors, but not all of them, are UK, Canadian or Australian Government employees and Crown Copyright is claimed/not claimed
- ☐ All of my co-authors are US Governmental employees and there is no copyright to transfer
- ☐ The work was performed by contractors of the US Government under contract number .....

- X** The copyright in the Article belongs to my employer (is a 'work made for hire') and I am granting licence to publish as an authorized representative of my employer
- Name and job title of assignee if different from the Author named above: Michel DuCharme EiC .....

**FUNDING**

- ☐ The research reported in the Article was funded by the US National Institutes of Health
- ☐ The research reported in the Article was funded by a third party other than the US National Institutes of Health

Name of third party funder(s): .....

**ASSIGNMENT OF PUBLISHING RIGHTS**

I hereby assign to Informa UK Limited trading as Taylor & Francis Group the copyright in the above specified manuscript (government authors not transferring copyright hereby assign a non-exclusive licence to publish) and any accompanying tables, illustrations, data and any other supplementary information intended for publication in all forms and all media (whether known at this time or developed at any time in the future) throughout the world, in all languages, for the full term of copyright, to take effect if and when the article is accepted for publication. If I am one of several co-authors, I hereby confirm that I am authorized by my co-authors to grant this Licence as their agent on their behalf. For the avoidance of doubt, this assignment includes the rights to supply the article in electronic and online forms and systems.

**I confirm that I have read and accept the full terms of the Journal's article publishing agreement attached to this form including my author warranties, and have reviewed the Journal's policies on Author Rights, Publishing Ethics and Conflicts of Interest Disclosure.**

**Copyright authority and confirming originality of work**

Signed: \_\_\_\_\_ Name printed: Michel DuCharme PhD

Editor-in-Chief for DRDC Date: 26 March 2024

**Please return the completed and signed original of this form and the Agreement that is attached to it by post or fax. You may email a scanned copy of the signed Agreement for convenience, but please return the original copy signed copy by post.**

**THIS FORM WILL BE RETAINED BY THE PUBLISHER FOR ADMINISTRATIVE PURPOSES.**
